# Supplementary material for: Downregulation of Chloroplast RPS1 Negatively Modulates Nuclear Heat-Responsive Expression of HsfA2 and Its Target Genes in Arabidopsis
Source: PubMed Central journal article supplement (PMC3342936; doi:10.1371/journal.pgen.1002669), 2012-05-03
Supplement: pgen.1002669.s001.pdf [file pgen.1002669.s001.pdf]

Figure S1. Yu et al.

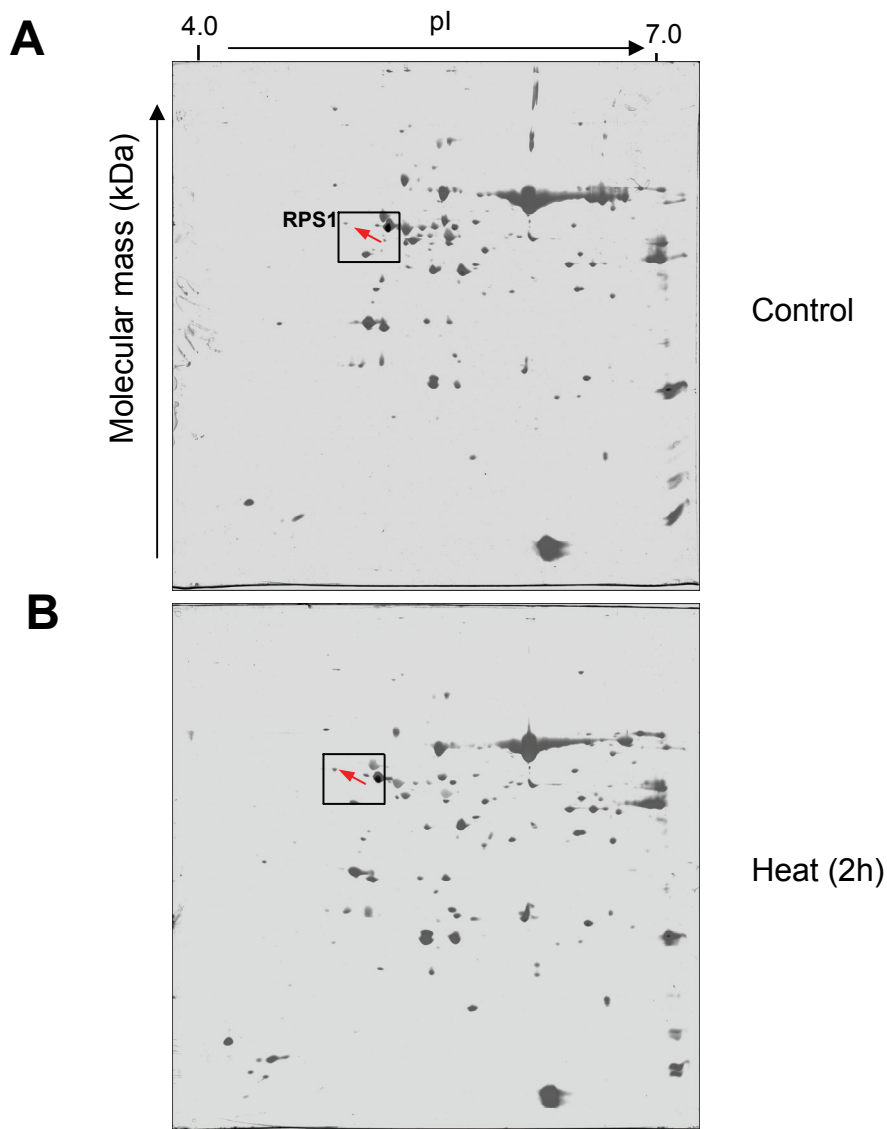

**Figure S1.** Silver stains of 2D-PAGE electrophoresis separation of proteins in response to heat treatment.

Proteins were extracted from control leaves (A) and the challenged leaves (B) at 38°C for 2 h in dark. The fully-expanded leaves were excised from 21-d-old wild type plants for control or heat treatment. Arrows indicate the RPS1 spot. Three independent experiments were performed and showed similar patterns.
