# Supplementary material for: Downregulation of Chloroplast RPS1 Negatively Modulates Nuclear Heat-Responsive Expression of HsfA2 and Its Target Genes in Arabidopsis
Source: PubMed Central journal article supplement (PMC3342936; doi:10.1371/journal.pgen.1002669), 2012-05-03
Supplement: pgen.1002669.s003.pdf [file pgen.1002669.s003.pdf]

Figure S3. Yu et al.

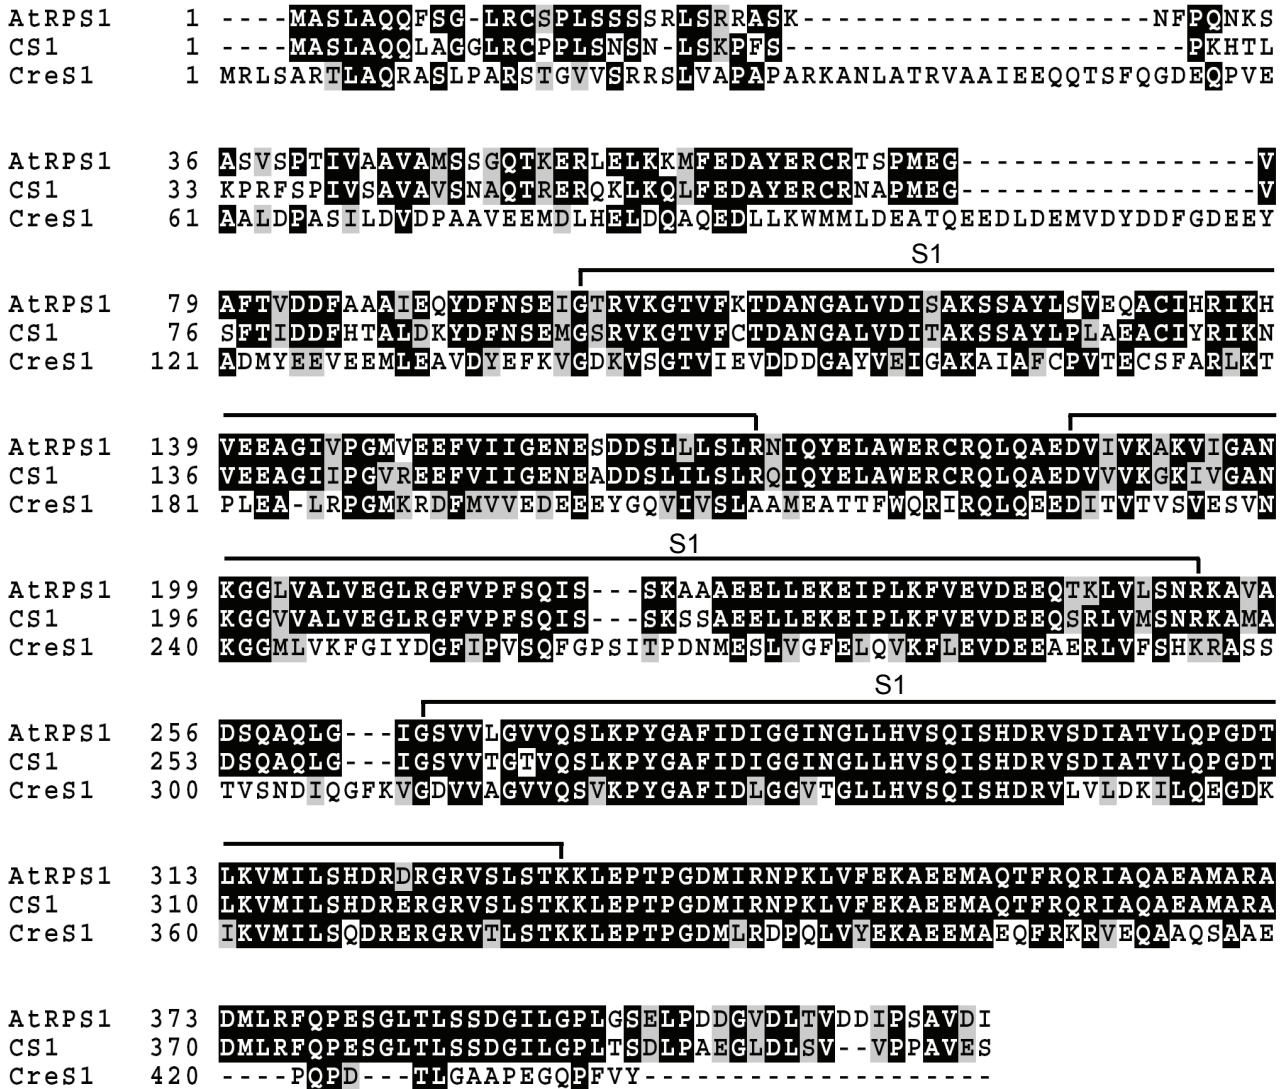

Figure S3. Alignments of derived amino acid sequences of AtRPS1, CS1 and CreS1.

Amino acid sequences of AtRPS1 (At5g30510), CS1 in spinach (accession number: M82923) and CreS1 in *Chlamydomonas reinhardtii* (accession number: AJ585191) were aligned using ClustalW (<http://www.ebi.ac.uk/clustalw>). Alignment was shaded using BoxShade ([http://www.ch.embnet.org/software/BOX\\_form.html](http://www.ch.embnet.org/software/BOX_form.html)). Identical amino acid residues and conservative changes were depicted in black and grey background, respectively. Three S1 domains were labeled.
