# Supplementary material for: Downregulation of Chloroplast RPS1 Negatively Modulates Nuclear Heat-Responsive Expression of HsfA2 and Its Target Genes in Arabidopsis
Source: PubMed Central journal article supplement (PMC3342936; doi:10.1371/journal.pgen.1002669), 2012-05-03
Supplement: pgen.1002669.s004.pdf [file pgen.1002669.s004.pdf]

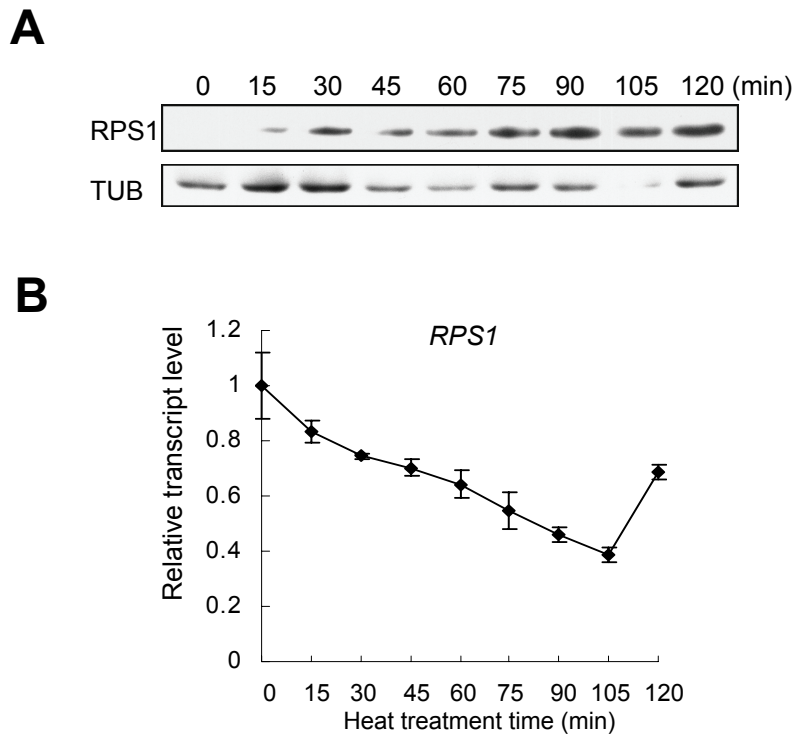

**Figure S4.** Transcription and protein levels of *RPS1* in response to heat stress.

(A) Western blot analysis showing *RPS1* protein levels in wild type leaves in response to heat treatment (38°C) in dark for the indicated time with an *RPS1* polyclonal antibody. Equal protein loading was confirmed with antiserum against  $\alpha$ -Tubulin. (B) qRT-PCR analysis of mRNA levels of *RPS1* in detached, fully-extended WT leaves challenged with heat treatment (38°C) for the indicated time in dark. *Actin2* was used as the internal standard. Error bars indicate standard deviations of three technical replicates, and the results were consistent in three biological replicates.
