# Supplementary material for: Downregulation of Chloroplast RPS1 Negatively Modulates Nuclear Heat-Responsive Expression of HsfA2 and Its Target Genes in Arabidopsis
Source: PubMed Central journal article supplement (PMC3342936; doi:10.1371/journal.pgen.1002669), 2012-05-03
Supplement: pgen.1002669.s006.pdf [file pgen.1002669.s006.pdf]

**Figure S6.** Yu et al.

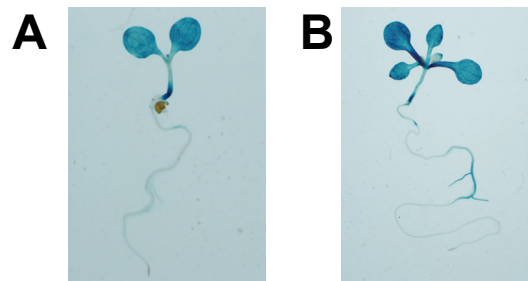

**Figure S6.** Analysis of *pRPS1::GUS* expression in transgenic plants.

Transgenic *Arabidopsis* plants harboring *pRPS1::GUS* constructs were analyzed by GUS-staining assay. GUS-staining patterns of the representative 5-d-old (A) and 15-d-old (B) transgenic seedlings grown on half-strength MS medium.
