# Supplementary material for: Downregulation of Chloroplast RPS1 Negatively Modulates Nuclear Heat-Responsive Expression of HsfA2 and Its Target Genes in Arabidopsis
Source: PubMed Central journal article supplement (PMC3342936; doi:10.1371/journal.pgen.1002669), 2012-05-03
Supplement: pgen.1002669.s007.pdf [file pgen.1002669.s007.pdf]

**Figure S7.** Yu et al.

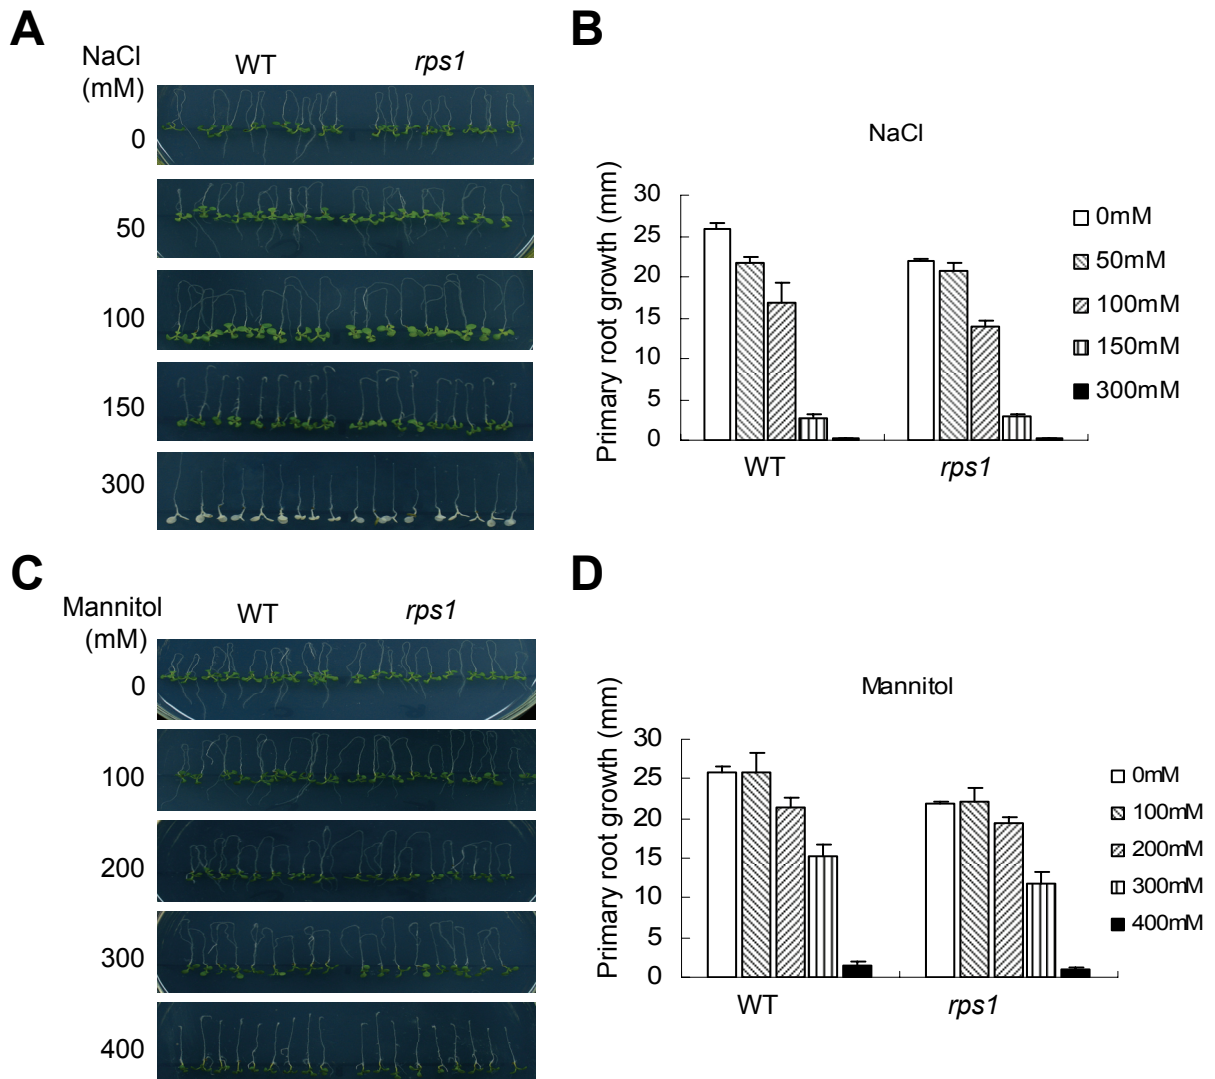

**Figure S7.** Characterization of primary root growth of wild type and *rps1* mutant plants under salt or osmotic stress.

5-d-old wild-type and *rps1* mutant seedlings grown under normal growth conditions were transferred to MS medium containing NaCl or mannitol respectively. Phenotypes of wild type and *rps1* mutant seedlings treated with NaCl (A) or mannitol (C) were photographed and bending-growth of primary roots under salt (B) or osmotic stress (D) was measured at day 7 after transfer. Error bars represent standard deviations ( $n=24$  plants). Results from one of two independent experiments are shown.
