# Supplementary material for: Downregulation of Chloroplast RPS1 Negatively Modulates Nuclear Heat-Responsive Expression of HsfA2 and Its Target Genes in Arabidopsis
Source: PubMed Central journal article supplement (PMC3342936; doi:10.1371/journal.pgen.1002669), 2012-05-03
Supplement: pgen.1002669.s008.pdf [file pgen.1002669.s008.pdf]

**Figure S8.** Yu et al.

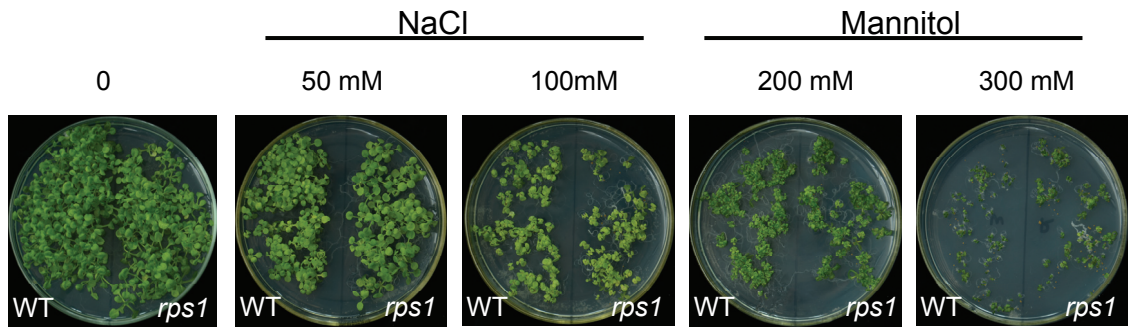

**Figure S8.** Growth characterization of wild type and *rps1* mutant seedlings under salt or osmotic stress.

Phenotypes of wild type and *rps1* mutant seedlings grown on MS medium with NaCl or mannitol were photographed at day 14 after germination.
