# Supplementary material for: Downregulation of Chloroplast RPS1 Negatively Modulates Nuclear Heat-Responsive Expression of HsfA2 and Its Target Genes in Arabidopsis
Source: PubMed Central journal article supplement (PMC3342936; doi:10.1371/journal.pgen.1002669), 2012-05-03
Supplement: pgen.1002669.s012.pdf [file pgen.1002669.s012.pdf]

**Figure S12.** Yu et al.

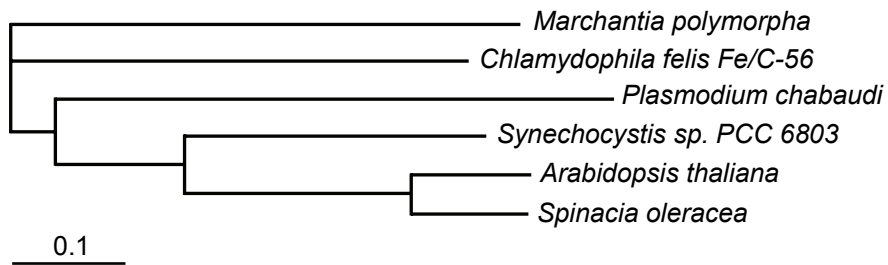

**Figure S12.** Phylogenetic relationships of RPS1s in *Arabidopsis thaliana* (At5g30510), *Spinacia oleracea* (accession number: M82923), *Synechocystis sp. PCC 6803* (accession number: gj|1652650), *Marchantia polymorpha* (accession number: gj|786212), *Chlamydomonas reinhardtii* (accession number: AJ585191) and *Plasmodium chabaudi* (accession number: gj|70945988).

A rooted phylogenetic tree was constructed using TreeView version 1.6.6 software with the neighbor-joining method based on ClustalW multiple alignments of the possible RPS1s. Bar = 0.1 amino acid substitutions per site.
