# Supplementary material for: Downregulation of Chloroplast RPS1 Negatively Modulates Nuclear Heat-Responsive Expression of HsfA2 and Its Target Genes in Arabidopsis
Source: PubMed Central journal article supplement (PMC3342936; doi:10.1371/journal.pgen.1002669), 2012-05-03
Supplement: pgen.1002669.s014.pdf [file pgen.1002669.s014.pdf]

**Figure S14.** Yu et al.

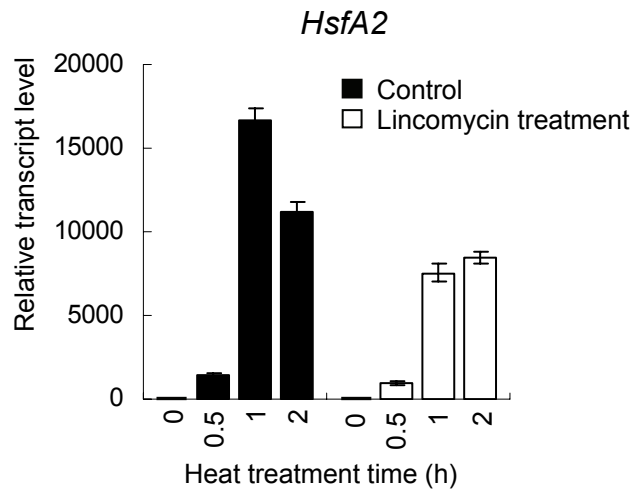

**Figure S14.** Heat-responsive expression of *HsfA2* is severely inhibited in wild type seedlings by Lincomycin treatment.

qRT-PCR analysis of mRNA levels of *HsfA2* in 6-d-old seedlings of WT challenged with heat treatment (38°C) for 2 h in dark under control or lincomycin treatment condition. *Actin2* was used as the internal standard. Error bars indicate standard deviations of three technical replicates, and the results were consistent in three biological replicates.
