# Supplementary material for: Downregulation of Chloroplast RPS1 Negatively Modulates Nuclear Heat-Responsive Expression of HsfA2 and Its Target Genes in Arabidopsis
Source: PubMed Central journal article supplement (PMC3342936; doi:10.1371/journal.pgen.1002669), 2012-05-03
Supplement: pgen.1002669.s015.pdf [file pgen.1002669.s015.pdf]

**Supplemental Table S1.** Sequences of the primers for constructs

| Primers for constructs |                                      |
|------------------------|--------------------------------------|
| Primer Name            | Sequence(5'-3')                      |
| ROX+                   | AAAGGATCCATGGCGTCTTTGGCTCAGCAATTC    |
| ROX-                   | AAAGGTACCCTAAATATCAACTGCAGAAGGAATG   |
| RGFP+                  | AAACTCGAGATGGCGTCTTTGGCTCAGCAATTC    |
| RGFP-                  | AAAAGTAGTGGAATATCAACTGCAGAAGGAATGTC  |
| RComp+                 | AAAGGTACCGTCTCCGACCTATTATGACGAAC     |
| RComp-                 | AGGTCTAGATCTGAAGATATCCATACCCAACAC    |
| FRNAi+                 | AAACCCGGGCTCGAGCTGTGTGAGTGAGTGAGACTC |
| FRNAi -                | CGCTCTAGATGACAAACTCTTCCACCATAC       |
| RRNAi+                 | AAAGAGCTCCTCGAGCTGTGTGAGTGAGTGAGACTC |
| RRNAi-                 | CACGCGCCGCTGACAAACTCTTCCACCATAC      |
| 121A2-F                | AATCTAGACTCTGAGCTTATGGATTTGAG        |
| 121A2-R                | AAGAGCTCGACCGCAACAAGTAGATGTG         |
| RGUS+                  | AAAAAGCTTGTCTCCGACCTATTATGACGAAC     |
| RGUS-                  | AGAGGATCCATAAGCATCTTCGAACATCTTCTTC   |
