# Supplementary material for: Downregulation of Chloroplast RPS1 Negatively Modulates Nuclear Heat-Responsive Expression of HsfA2 and Its Target Genes in Arabidopsis
Source: PubMed Central journal article supplement (PMC3342936; doi:10.1371/journal.pgen.1002669), 2012-05-03
Supplement: pgen.1002669.s016.pdf [file pgen.1002669.s016.pdf]

**Supplemental Table S2.** Sequences of the primers for qRT-PCR and RT-PCR

| Primers for qRT-PCR |                            |
|---------------------|----------------------------|
| Primer Name         | Sequence(5'-3')            |
| RPS1-F              | AACTGTTCTTCAGCCTGGTGACAC   |
| PRS1-R              | CTGTCTGAATGTCTGAGCCATCTC   |
| HsfA2-F             | TCGTCAGCTCAATACTTATGGATTTC |
| HsfA2-R             | CACATGACATCCCAGATCCTTGC    |
| Hsp101-F            | GAGGAGTTGCTTTGGCAGTC       |
| Hsp101-R            | CAGCGCCTGCATCTATGTAA       |
| Hsp17.7-F           | TCAGGTCCAGATAGAGAACGAGAAC  |
| Hsp17.7-R           | CCTCTCCATCCTCACAACTTCAC    |
| Hsp18.1-F           | GGTTACCGGAGAATGCAAAGATG    |
| Hsp18.1-R           | CGATGGACTTGACTTGAGGCTTC    |
| Hsp25.3-F           | ACGGAGTCCTCTTTATCACTATCCC  |
| Hsp25.3-R           | GATCGAGTCCTACTGAATCTGG     |
| Hsp70-F             | GCAGAAGATTGAGAAGGCGATTG    |
| Hsp70-R             | CGCTCTAATCCACCTCTTCGATC    |
| Gosl1-F             | AGCCGTTTCATCACCGCTCTTAC    |
| Gosl1-R             | ACTCCTGGCAACATTCAAGCAG     |
| APX2-F              | AATATGCTGCAGATGAGGATGC     |
| APX2-R              | CAAGAATCAAGGAGGTAGGAGATG   |
| RPS17-F             | ATGATAACGTCGTCCCTAAC       |
| RPS17-R             | CTCTTTTCCAGTCTGACCACG      |
| Actin2-F            | GGCAAGTCATCACGATTGG        |
| Actin2-R            | CAGCTTCCATTCCCACAAAC       |
| Primers for RT-PCR  |                            |
| Primer Name         | Sequence(5'-3')            |
| RPS1+               | TGTAGCAGATAGCCAAGCTCAG     |
| RPS1-               | CTAAATATCAACTGCAGAAGGAATG  |
| HsfA2+              | ATGGAAGAACTGAAAGTGGAATG    |
| HsfA2-              | GATCAATCTTTCTGAATCCATAAG   |
